1 **Staphylococcal protein A inhibits IgG-mediated phagocytosis by blocking the interaction**  
2 **of IgGs with FcγRs and FcRn**

3

4 Ana Rita Cruz<sup>1,2</sup>, Arthur E. H. Bentlage<sup>3</sup>, Robin Blonk<sup>1</sup>, Carla J. C. de Haas<sup>1</sup>, Piet C. Aerts<sup>1</sup>,  
5 Lisette M. Scheepmaker<sup>1</sup>, Inge G. Bouwmeester<sup>1</sup>, Anja Lux<sup>4</sup>, Jos A. G. van Strijp<sup>1</sup>, Falk  
6 Nimmerjahn<sup>4</sup>, Kok P. M. van Kessel<sup>1</sup>, Gestur Vidarsson<sup>3</sup>, and Suzan H. M. Rooijackers<sup>1</sup>

7 <sup>1</sup>Department of Medical Microbiology, University Medical Center Utrecht, Utrecht University,  
8 Utrecht, The Netherlands

9 <sup>2</sup> GSK, Siena, Italy

10 <sup>3</sup> Department of Experimental Immunohematology, Sanquin Research, and Landsteiner  
11 Laboratory, Academic Medical Center, University of Amsterdam, Amsterdam, Netherlands

12 <sup>4</sup> Division of Genetics, Department of Biology, Friedrich-Alexander-University of Erlangen-  
13 Nürnberg, Erlangen 91058, Germany

14 **Abstract**

15 Immunoglobulin G molecules are crucial for the human immune response against bacterial  
16 infections. IgGs can trigger phagocytosis by innate immune cells, like neutrophils. To do so,  
17 IgGs should bind to the bacterial surface via their variable Fab regions and interact with Fc $\gamma$   
18 receptors (Fc $\gamma$ Rs) and complement C1 via the constant Fc domain. C1 binding to IgG-labeled  
19 bacteria activates the complement cascade, which results in bacterial decoration with C3-  
20 derived molecules that are recognized by complement receptors (CRs) on neutrophils. Next to  
21 Fc $\gamma$ Rs and CRs on the membrane, neutrophils also express the intracellular neonatal Fc receptor  
22 (FcRn). We previously reported that staphylococcal protein A (SpA), a key immune evasion  
23 protein of *Staphylococcus aureus*, potently blocks IgG-mediated complement activation and  
24 killing of *S. aureus* by interfering with IgG hexamer formation. SpA is also known to block  
25 IgG-mediated phagocytosis in absence of complement but the mechanism behind it remains  
26 unclear. Here we demonstrate that SpA blocks IgG-mediated phagocytosis and killing of *S.*  
27 *aureus* through inhibition of the interaction of IgGs with Fc $\gamma$ Rs (Fc $\gamma$ RIIa and Fc $\gamma$ RIIIb, but not  
28 Fc $\gamma$ RI) and FcRn. Furthermore, our data show that multiple SpA domains are needed to  
29 effectively block IgG1-mediated phagocytosis. This provides a rationale for the fact that SpA  
30 from *S. aureus* contains four to five repeats. Taken together, our study elucidates the molecular  
31 mechanism by which SpA blocks IgG-mediated phagocytosis and supports the idea that next to  
32 Fc $\gamma$ Rs, also the intracellular FcRn receptor is essential for efficient phagocytosis and killing of  
33 bacteria by neutrophils.

## 34 **Introduction**

35 Immunoglobulin G (IgG) antibodies play a key role in the host immune response against  
36 bacteria. IgGs consist of two functional domains: the antibody-binding fragment (Fab) and the  
37 crystallizable fragment (Fc). Via their variable Fab domain, antibodies can directly neutralize  
38 the function of bacterial virulence factors. Moreover, when antibodies bind to the bacterial  
39 surface via their Fab domain, their constant Fc domain can trigger bacterial clearance by  
40 interacting with the innate immune system (1). IgG-Fcs have two important effector functions.  
41 While they can directly bind to Fc gamma receptors (FcγRs) expressed on the surface of innate  
42 immune cells, they can also bind complement C1 via clustered IgGs and activate the classical  
43 complement pathway. The activation of the complement cascade results in bacterial decoration  
44 with C3-derived opsonins, that are in turn recognized by complement receptors (CRs) on innate  
45 immune cells, like neutrophils. Both pathways ultimately trigger phagocytosis and killing of  
46 the invading bacteria.

47 FcγRs are membrane glycoproteins and are divided into six classes: FcγRI (CD64), FcγRIIa  
48 (CD32a), FcγRIIb (CD32b), FcγRIIc (CD32c), FcγRIIIa (CD16a), and FcγRIIIb (CD16b).  
49 FcγRI is the only high-affinity receptor, as it can bind to monomeric IgGs while the other  
50 receptors mainly bind to aggregated IgGs. The low affinity receptors have polymorphic  
51 variants. Besides the classical extracellular Fc receptors, IgG-Fcs are also recognized by the  
52 intracellular neonatal Fc receptor (FcRn) (2) (see **Fig. 1A**). FcRn is found on different cell  
53 types, including epithelial cells, endothelial cells and placental syncytiotrophoblasts. FcRn is  
54 mainly known for its role in transferring IgG from the mother to the fetus (3) and in the  
55 regulation of IgG half-life (4, 5). More recently, FcRn was also found to be expressed in  
56 monocytes, macrophages, dendritic cells (6) and neutrophils (2) and shown to be involved in  
57 phagocytosis of IgG-coated pneumococci (2). The binding sites of FcγRs and FcRn on IgG are  
58 different (see **Fig. 1B**): while FcγRs bind with a 1:1 stoichiometry to the lower hinge and CH2

59 domain of IgG (7), FcRn binds the CH2-CH3 interface of IgG with a 2:1 stoichiometry (8–10).  
60 Another difference is that FcRn-IgG binding only occurs at acidic pH (< 6.5) (11).  
61 Interestingly, the Fc fragment of IgGs is not only recognized by host immune effector proteins,  
62 but also by bacterial immune evasion molecules (12), like staphylococcal protein A (SpA). SpA  
63 is a key immune evasion factor of *Staphylococcus aureus*, a prominent human pathogen that  
64 spreads in healthcare facilities and in the community, causing multiple diseases (13).  
65 SpA is mainly anchored to the bacterial cell wall, although it is also found in the extracellular  
66 milieu (14, 15). SpA is composed of five highly homologous three-helix-bundle domains  
67 (named A to E), each of which can bind the CH2-CH3 interface of IgG (see **Fig. 1B** and **Fig.**  
68 **2A**), via helices I and II (16). Moreover, SpA domains also bind the Fab region of most VH3-  
69 type family of antibodies, via helices II and III (17). Of note, the Fc domain recognition  
70 properties of SpA are subclass and allotype specific. SpA binds IgG1, IgG2 and IgG4  
71 subclasses, but not to the majority of IgG3 allotypes (18). This is due to an amino acid  
72 substitution in position 435, where an histidine in IgG1, IgG2 and IgG4 becomes an arginine in  
73 most of IgG3 allotypes (19, 20). Therefore, the effector functions of IgG3 remain unaffected  
74 by the presence of SpA (21).  
75 We and others showed that SpA protects *S. aureus* from phagocytic killing by binding the IgG-  
76 Fc fragment (21–23). In our previous study, we unveiled how SpA blocks IgG-mediated  
77 complement activation and subsequent killing of *S. aureus* (21). We showed that SpA binds  
78 competitively to the Fc-Fc interaction interface on IgG monomers, which effectively prevents  
79 IgGs from forming IgG hexamers (21). IgG hexamerization on antigenic surfaces is important  
80 for efficient binding of C1 and subsequent activation of the complement system (24).  
81 However, SpA was also reported to prevent IgG-dependent phagocytic killing in the absence  
82 of complement (23). To date, the precise mechanism by which SpA blocks FcγR-mediated

83 phagocytosis remains elusive. SpA is known to reduce binding of antigen-complexed and heat-  
84 aggregated IgG to Fc receptor-bearing cells (25). However, soluble Fc $\gamma$ RI and Fc $\gamma$ RIIa were  
85 shown not to compete with SpA for binding to soluble IgG (26). Here, we investigate how SpA  
86 interferes with Fc $\gamma$ R-mediated phagocytosis of *S. aureus* and reveal an important role of FcRn  
87 in this process.

## 88 **Materials and Methods**

### 89 **Production of human monoclonal antibodies**

90 The human anti-DNP and anti-WTA GlcNAc- $\beta$ -4497 monoclonal antibodies were produced  
91 recombinantly in human Expi293F cells (Life Technologies) as described before (21). The VH  
92 and VL sequences of the anti-DNP (DNP-G2a2) (27) and anti-WTA GlcNAc- $\beta$ -4497 (patent  
93 WO/2014/193722) (28) were derived from previously reported antibodies. The anti-Hla  
94 (MEDI4893; patent WO/2017/075188A2), which served as a control, was a gift from Dr Alexey  
95 Ruzin, MedImmune (AstraZeneca). The human anti-TNF $\alpha$  IgG1 monoclonal antibody was  
96 expressed in HEK-293F FreeStyle cell line expression system (Life Technologies, Carlsbad,  
97 CA) with co-transfection of vectors encoding p21, p27, and pSVLT genes to increase protein  
98 production (29). The VH and VL sequences of the anti-TNF $\alpha$  (patent US 6090382A) were also  
99 derived from a previously published antibody. Anti-TNF $\alpha$  IgG1 was purified on Protein A  
100 HiTrapHP columns (GE Healthcare Life Sciences, Little Chalfont, UK) using Akta-prime plus  
101 (GE Healthcare Life Sciences) and dialyzed overnight against PBS.

102

### 103 **Cloning, expression and purification of staphylococcal proteins**

104 SpA constructs were cloned, expressed and purified as reported before (21). The wild-type B  
105 domain of SpA (SpA-B), SpA-B lacking Fc-binding properties (SpA-B<sup>KK</sup>; Q9K and Q10K  
106 mutations) and SpA-B lacking Fab-binding properties (SpA-B<sup>AA</sup>; D36A and D37A mutations)  
107 were produced for a previous study (21), while the five-domains SpA (SpA-WT) and the  
108 repeating five B domains SpA (SpA-5xB) were newly produced, following the same steps  
109 described before (21). For the design of SpA-5xB, multiple attempts were made to rearrange  
110 its nucleotide sequence to make the synthesis as the gBlock (Integrated DNA technologies,  
111 IDT) possible. Besides the in house produced SpA-WT, for some of the experiments, we used

112 a five-domains SpA (also named SpA-WT) that is commercially available (Prospec, PRO-  
113 1925). The recombinant protein FLIPr-like was expressed and purified as described before (30).

114

### 115 **Bacterial strains and culture conditions**

116 mAmetrine (mAm)-labeled *S. aureus* Newman  $\Delta spa/sbi$  and Newman WT were constructed as  
117 described before (32). Briefly, bacteria were transformed with a pCM29 plasmid that  
118 constitutively and robustly expresses a codon optimized mAm protein (GenBank: KX759016)  
119 (33) from the sarAP1 promoter (34). For generation of *pspa* complemented Newman  $\Delta spa/sbi$ ,  
120 the *spa* gene and its promoter were first PCR amplified from genomic DNA of *S. aureus*  
121 Newman WT. The PCR products were cloned into the pCM29 vector via Gibson assembly and  
122 *E. coli* DC10b transformed with pCM29-*spa* by heat shock. Subsequently, the plasmid was  
123 isolated and competent *S. aureus* Newman  $\Delta spa/sbi$  were transformed with the plasmid through  
124 electroporation using Bio-Rad Gene Pulser Xcell Electroporation System (200  $\Omega$ , 25  $\mu$ F, 2.5  
125 kV). After recovery, bacteria were plated on Todd-Hewitt agar supplemented with 5  $\mu$ g/mL  
126 chloramphenicol to select plasmid-complemented colonies. Bacteria were grown overnight in  
127 Todd Hewitt broth (THB) plus 10  $\mu$ g/mL chloramphenicol, diluted to an  $OD_{600} = 0.05$  in fresh  
128 THB plus chloramphenicol, and cultured until midlog phase ( $OD_{600} = 0.5$ ). The mAmetrine-  
129 expressing strains Newman  $\Delta spa/sbi$  and Newman WT were washed and resuspended in RPMI-  
130 H medium (RPMI + 0.05% HSA) and stored until use at  $-20$  °C. The Newman  $\Delta spa/sbi$  + *pspa*  
131 strain was FITC-labeled before storage. Briefly, midlog phase bacteria were washed with PBS  
132 and resuspended in 0.5 mg/ml FITC (Sigma Aldrich) in PBS for 1 h on ice, washed twice in  
133 PBS, resuspended in RPMI-H medium and stored until use at  $-20$  °C.

134

135 **Phagocytosis of *S. aureus* by neutrophils**

136 Human neutrophils were purified from blood of healthy donors by the Ficoll/Histopaque  
137 density gradient method (35). To study the inhibitory effect of SpA on phagocytosis, we used  
138 a recently described phagocytosis assay (32), with some adaptations. mAm-expressing  
139 Newman  $\Delta spa/sbi$  ( $7.5 \times 10^5$  CFU) were first incubated with human monoclonal anti-WTA  
140 IgG1 for 15 min at 37 °C with shaking ( $\pm 700$  rpm) in a round-bottom microplate. After, bacteria  
141 were washed with RPMI-H by centrifugation (3600 rpm, 7 min) and incubated in absence or  
142 presence of SpA-B, SpA-WT, SpA-5xB or FLIPr-like for 15 min at 37 °C with shaking. Finally,  
143 bacteria were mixed with neutrophils for another 15 min at 37 °C with shaking, at a 10:1  
144 bacteria:neutrophil ratio. Alternatively, bacteria were simultaneously incubated with human  
145 monoclonal anti-WTA IgG1, IgG3 or heat-inactivated normal human serum (HI-NHS) with  
146 buffer, SpA constructs or FLIPr-like in RPMI-H medium for 15 min at 37 °C with shaking.  
147 Bacteria were then incubated with freshly isolated neutrophils for another 15 min at 37 °C with  
148 shaking. To evaluate the inhibitory effect of cell-attached SpA on phagocytosis,  $7.5 \times 10^5$  CFU  
149 of fluorescently labeled Newman  $\Delta spa/sbi$ , Newman WT or Newman  $\Delta spa/sbi + pspa$  were  
150 incubated with anti-WTA IgG1, IgG3 or HI-NHS in RPMI-H. After 15 min at 37 °C with  
151 shaking, IgG-opsonized bacteria were incubated with  $7.5 \times 10^4$  neutrophils for another 15 min  
152 at 37 °C with shaking. All samples were fixed with 1% paraformaldehyde in RPMI-H (final  
153 concentration). The binding/internalization of mAm-bacteria to the neutrophils was detected  
154 using flow cytometry (BD FACSVerser) and data were analyzed based on FSC/SSC gating of  
155 neutrophils using FlowJo software.

156



157 **Killing of *S. aureus* by neutrophils**

158 mAmetrine-expressing Newman  $\Delta spa/sbi$  were freshly grown to midlog phase, washed with  
159 PBS and resuspended in HBSS-H medium (Hank's balanced salt solution (HBSS) + 0.1%  
160 HSA). Newman  $\Delta spa/sbi$  ( $8.5 \times 10^5$  CFU) were incubated with fourfold titration of anti-WTA  
161 IgG1 or IgG3 in the absence or presence of 200 nM SpA-B or SpA-WT in HBSS-H. After 30  
162 min at 37 °C, bacteria were incubated with neutrophils for 90 min under 5% CO<sub>2</sub> at 37 °C, at  
163 a 1:1 bacteria:neutrophil ratio. Subsequently, neutrophils were lysed with cold 0.3% (wt/vol)  
164 saponin in water for up to 15 min on ice. Samples were serially diluted in PBS and plated in  
165 duplicate onto TSA plates, which were incubated overnight at 37 °C. Viable bacteria were  
166 quantified by CFU enumeration.

167

168 **ELISA assays**

169 MaxiSorp plates (Nunc) were coated with 3 µg/mL SpA-B, SpA-B<sup>KK</sup>, SpA-B<sup>AA</sup>, SpA-WT or  
170 SpA-5xB in 0.1 M sodium carbonate at 4 °C, overnight. After three washes with PBS-T (PBS,  
171 0.05% (v/v) Tween-20) pH 7, the wells were blocked with 4% bovine serum albumin (BSA) in  
172 PBS-T, for 1 h at 37 °C. The following incubations were performed for 1 h at 37 °C followed  
173 by three washes with PBS-T. 1 µg/mL of anti-WTA IgG1, anti-WTA IgG3, or anti-Hla IgG1  
174 were diluted in 1% BSA in PBS-T and added to the wells. For IgG-SpA binding detection at  
175 neutral and acidic conditions, the wells were incubated with a concentration range of a-WTA  
176 IgG1 (5-fold serial dilutions starting from 20 nM) diluted in PBS-T at pH 7 or pH 6. Bound  
177 antibodies were detected with horseradish peroxidase (HRP)-conjugated goat F(ab')<sub>2</sub> anti-  
178 human kappa (Southern Biotech) in 1% BSA in PBS-T and Tetramethylbenzidine as substrate.  
179 The reaction was stopped with 1N sulfuric acid and absorbance was measured at 450 nm in the  
180 iMark™ Microplate Absorbance Reader (BioRad).

181

## 182 **SpA expression and antibody binding on *S. aureus* Newman strains**

183 To detect cell-attached SpA,  $7.5 \times 10^5$  CFU of fluorescently labeled *S. aureus* Newman strains  
184 ( $\Delta spa/sbi$ , WT and  $\Delta spa/sbi + pspa$ ) were incubated in a round-bottom microplate with 1  
185  $\mu\text{g/mL}$  biotin-conjugated chicken anti-Protein A (Immunology Consultants Laboratory) in  
186 RPMI-H for 30 min at 4 °C under shaking conditions ( $\pm 700$  rpm), washed by centrifugation  
187 with RPMI-H (3600 rpm, 7 min), and incubated with 2  $\mu\text{g/mL}$  Alexa Fluor<sup>647</sup>-conjugated  
188 streptavidin (Jackson ImmunoResearch) in RPMI-H for another 30 min at 4 °C under shaking  
189 conditions. To measure antibody binding to the same strains, bacteria ( $7.5 \times 10^5$  CFU) were  
190 incubated with 3-fold serial dilutions of anti-DNP IgG1 or IgG3, anti-WTA IgG1 or IgG3 in  
191 RPMI-H (starting from 10 nM IgG), for 30 min at 4 °C, shaking. Subsequently, bacteria were  
192 washed by centrifugation with RPMI-H (3600 rpm, 7 min), and incubated with 0.5  $\mu\text{g/mL}$   
193 Alexa Fluor<sup>647</sup>-conjugated goat F(ab')<sub>2</sub> anti-human kappa (Southern Biotech) in RPMI-H for  
194 30 min at 4 °C under shaking conditions. After an additional wash with RPMI-H, all samples  
195 were fixed with 1% paraformaldehyde in RPMI-H. SpA expression and antibody binding on  
196 *S. aureus* Newman strains were detected using flow cytometry (BD FACSVerser) and data were  
197 analyzed using FlowJo software.

198

## 199 **Surface plasmon resonance measurements**

200 Affinity measurements of soluble IgG to FcγRs and FcRn were performed with the IBIS MX96  
201 biosensor system as described previously (36). In short, C-terminally site-specifically BirA-  
202 biotinylated human FcγRIIa H131, FcγRIIa R131, FcγRIIb, FcγRIIIa F158, FcγRIIIa V158,  
203 FcRn (SinoBiologicals; 10374-H27H1-B, 10374-H27H-B, 10259-H27H-B, 10389-H27H-B,  
204 10389-H27H1-B, CT071-H27H-B, respectively), FcγRIIIb NA1 and FcγRIIIb NA2 (produced

205 at the laboratory of Sanquin) were spotted onto a SensEye G-Streptavidin sensor (Senss,  
206 Enschede, Netherlands) using a continuous flow micro spotter (Wasatch Microfluidics, Salt  
207 Lake City, UT, United States) in running buffer (PBS 0.0075% Tween-80 (Amresco)), pH 7.4.  
208 The receptors were added at the following concentrations: 10 nM of Fc $\gamma$ RIIa H131, Fc $\gamma$ RIIa  
209 R131 and Fc $\gamma$ RIIb, 30 nM of Fc $\gamma$ RIIIa 158F, Fc $\gamma$ RIIIb NA1 and Fc $\gamma$ RIIIb NA2 and 100 nM of  
210 Fc $\gamma$ RIIIa 158V. For IgG-Fc $\gamma$ RI binding measurements, 30 nM of biotinylated mouse IgG1 anti-  
211 His was first spotted on the sensor, followed by 50 nM of His-tagged Fc $\gamma$ RI (SinoBiologicals,  
212 10256-H27H). Anti-TNF $\alpha$  IgG1 (200 nM) was then injected in combination with 1 $\mu$ M or 200  
213 nM SpA-B, SpA-WT, SpA-5xB or running buffer. For IgG-FcRn binding measurements, the  
214 running buffer was at pH6. Regeneration after each sample was carried out with 10 mM Gly-  
215 HCl, pH 2.4.

216

### 217 **Binding assays with hFc $\gamma$ R-expressing CHO cell lines**

218 CHO cells expressing human Fc $\gamma$ RI, Fc $\gamma$ RIIa H131, Fc $\gamma$ RIIa R131, Fc $\gamma$ RIIIb NA1 or Fc $\gamma$ RIIIb  
219 NA2 were generated at University of Erlangen-Nürnberg laboratory (37). Untransfected CHO  
220 cells were maintained in RPMI medium supplemented with 10% FCS, 2 mM glutamine, 1 mM  
221 sodium pyruvate, 0.1 mg/mL pen/strep and 0.1 mM non-essential amino acids at 37%, 5% CO<sub>2</sub>,  
222 while for the CHO cell lines stably transfected with human Fc $\gamma$ Rs, 0.05 mg/mL G418 was also  
223 added to the supplemented RPMI medium. Cells were collected by brief trypsinization, washed  
224 and resuspended in RPMI-H. Viability was >95% as assessed with trypan blue. mAm-  
225 expressing Newman  $\Delta spa/sbi$  ( $7.5 \times 10^5$  CFU or  $2.25 \times 10^6$  CFU) were first labeled with anti-  
226 WTA IgG1 or buffer control for 30 min at 4 °C with shaking ( $\pm 700$  rpm) in a round-bottom  
227 microplate. Bacteria were washed by centrifugation with RPMI-H (3600 rpm, 7 min) and after  
228 mixed with buffer, SpA-B, SpA-WT, SpA-5xB or FLIPr-like in RPMI-H for 30 min at 37 °C  
229 with shaking. Finally, CHO cells ( $7.5 \times 10^4$  cells) were added to the mixture (10:1 bacteria:cells

230 ratio for FcγRI-, FcγRIIa H131- and FcγRIIa R131-expressing CHO cells and 30:1  
231 bacteria:cells ratio for FcγRIIIb NA1- and FcγRIIIb NA2-expressing CHO cells) for another 30  
232 min at 37 °C with shaking. The reaction was stopped and fixed by addition of 1%  
233 paraformaldehyde (final concentration) in RPMI-H. The binding of mAm-bacteria to the CHO  
234 cells was measured by flow cytometry (BD FACSVerse) and data were analyzed based on  
235 FSC/SSC gating of CHO cells using FlowJo software.

236

### 237 **FcRn receptor-coated beads assays**

238 Streptavidin beads (Dynabeads M-270; Invitrogen) were washed in PBS-TH (phosphate-  
239 buffered saline [PBS], 0.05% [vol/vol] Tween-20, and 0.5% human serum albumin [HSA]) and  
240 incubated (diluted 100×) with 1 µg/mL C-terminally site-specifically BirA-biotinylated human  
241 FcRn (Acrobiosystems, FCM-H82W7) in PBS-TH for 30 min at 4 °C with shaking. FcRn-  
242 labeled beads were then washed twice with PBS-TH and resuspended in PBS-TH at pH 6.0.  
243 For binding of bacteria-bound IgG to FcRn-coated beads, mAm-expressing Newman  $\Delta spa/sbi$   
244 ( $6 \times 10^5$  CFU) were first incubated with anti-WTA IgG1 in RPMI-H for 30 min at 4 °C with  
245 shaking ( $\pm 700$  rpm). After a single wash by centrifugation (3600 rpm, 7 min) with PBS-TH at  
246 pH6, IgG1-labeled bacteria were incubated in absence or presence of SpA-B, SpA-WT or SpA-  
247 5xB in PBS-TH at pH6 for 30 min at 37 °C with shaking. From this step, all incubations and  
248 washes were performed using PBS-TH at pH6. FcRn-coated beads were then mixed with the  
249 bacteria for 30 min at 37 °C with shaking. For each condition, 0.5 µL of FcRn-coated beads  
250 were used ( $\sim 3 \times 10^5$  beads/condition). After two washes with PBS-TH, the beads were  
251 incubated with 1 µg/mL Alexa Fluor<sup>647</sup>-conjugated goat F(ab')<sub>2</sub> anti-human kappa (Southern  
252 Biotech, 2062-31) in PBS-TH for 30 min at 4 °C with shaking. For binding of soluble IgG to  
253 FcRn-coated beads, anti-DNP IgG1 was first incubated in absence or presence of recombinant  
254 SpA-B, SpA-WT, SpA-5xB or FLIPr-like in a round-bottom microplate at 4 °C with shaking.

255 After 30 min of incubation, IgG1 + Buffer/ SpA/ FLIPr-like were mixed with FcRn-labelled  
256 beads for another 30 min at 37 °C, shaking. After two washes with PBS-TH, the beads were  
257 incubated with 1 µg/mL Alexa Fluor<sup>647</sup>-conjugated goat F(ab')<sub>2</sub> anti-human kappa (Southern  
258 Biotech, 2062-31) in PBS-TH for 30 min at 4 °C with shaking. Finally, the beads were washed  
259 twice with PBS-TH and then fixed with 1% paraformaldehyde in PBS-TH. Binding of bacteria-  
260 bound IgG and soluble IgG to the beads was detected using flow cytometry (BD FACSVerser)  
261 and data were analyzed based on single bead population using FlowJo software.

262

### 263 **Ethical Statement**

264 Human serum and blood were obtained from healthy donors after informed consent was  
265 obtained from all subjects, in accordance with the Declaration of Helsinki. Approval from the  
266 Medical Ethics Committee of the University Medical Center Utrecht was obtained (METC  
267 protocol 07-125/C, approved March 1, 2010).

268

### 269 **Statistical analysis**

270 Statistical analysis was performed with GraphPad Prism v.8.3 software, using one-way  
271 ANOVA as indicated in the figure legends. At least three experimental replicates were  
272 performed to allow statistical analysis.

273 **Results**

274 **Soluble SpA requires multiple domains to effectively block IgG1-mediated phagocytosis**  
275 **and killing of *S. aureus***

276 To investigate how SpA blocks IgG-mediated phagocytosis, we first studied whether different  
277 forms of soluble SpA affect phagocytosis of *S. aureus* by human neutrophils. To exclusively  
278 determine the effect of soluble SpA in this assay, we used an isogenic mutant of Newman *S.*  
279 *aureus* strain lacking both SpA and the second Ig-binding protein of *S. aureus*, Sbi (38)  
280 (Newman  $\Delta spa/sbi$ ). Newman  $\Delta spa/sbi$  was first incubated with a human monoclonal IgG1  
281 antibody that targets wall teichoic acid (anti-WTA IgG1). WTA is a highly abundant surface  
282 glycopolymer anchored to the peptidoglycan layer of *S. aureus* (39). After a wash to remove  
283 unbound IgGs, IgG1-labeled bacteria were incubated with different recombinant SpA  
284 constructs: wild-type SpA composed of five IgG-binding domains (SpA-WT), a single SpA-B  
285 domain (SpA-B) and a SpA variant composed of five repeating B domains (SpA-5xB) (see **Fig.**  
286 **2A**). As a positive control we used the homologue of formyl peptide receptor-like 1 inhibitor  
287 (FLIPr-like), a staphylococcal phagocytosis inhibitor that directly binds to Fc $\gamma$ Rs (40). While  
288 SpA-WT and SpA-5xB potently reduced phagocytosis mediated by IgG1, the single SpA-B  
289 domain showed a minimal effect on phagocytosis (**Fig. 2B** and **S1A**).

290 To understand whether the SpA constructs could also inhibit phagocytosis when in presence of  
291 soluble IgGs, we also assessed phagocytosis when bacteria, IgGs and SpA were incubated at  
292 the same step. In this set-up where SpA can interact with both target-bound and soluble  
293 antibodies, we observed that multi-domain SpA can still inhibit IgG1-mediated phagocytosis,  
294 although the inhibitory effect was slightly weaker (**Fig. 2C** and **S1B**). When instead of anti-  
295 WTA IgG1 antibodies we used IgG3, none of the SpA constructs affected phagocytosis (**Fig.**  
296 **2D**), suggesting that SpA interferes with IgG-mediated phagocytosis by binding to the Fc region  
297 of IgGs. Although anti-WTA antibody clone 4497 used in these assays belongs to VH3-type

298 family (41), it does not bind SpA via its Fab region (21). The SpA binding properties of anti-  
299 WTA IgG1 and IgG3 were verified by comparing their binding to the wild-type SpA-B with  
300 two SpA-B variants that cannot interact with Fc (SpA-B<sup>KK</sup>) or Fab (SpA-B<sup>AA</sup>) domains of IgG  
301 (**Fig. S1C, D**). The binding of a VH3 family antibody (anti-Hla IgG1) was also measured as a  
302 control for Fab binding to SpA-B<sup>KK</sup>. This confirms that soluble SpA blocks IgG-mediated  
303 phagocytosis by binding to the IgG-Fc region.

304 Next, we evaluated whether inhibition of IgG-mediated phagocytosis by SpA results in less  
305 phagocytic killing of *S. aureus* by human neutrophils. Upon engulfment, neutrophils can kill  
306 bacteria intracellularly by exposing them to antimicrobial peptides, enzymes and reactive  
307 oxygen species (42). While anti-WTA IgG1 antibodies alone induced killing of *S. aureus*, the  
308 presence of SpA-WT blocked killing (**Fig. 2E**). In line with the phagocytosis data, we observed  
309 that a single SpA-B domain cannot block IgG1-mediated killing (**Fig. 2E**). As expected, the  
310 presence of SpA proteins did not affect IgG3-mediated killing of *S. aureus* (**Fig. 2F**).

311 Altogether, these data show that soluble SpA blocks phagocytosis and killing of *S. aureus* by  
312 binding to the Fc region of IgG. Furthermore, we find that multiple SpA domains are required  
313 to potentially block IgG-mediated phagocytosis.

314

### 315 **Surface-bound SpA blocks IgG-mediated phagocytosis of *S. aureus***

316 Next, we assessed whether surface attached SpA also reduces IgG-mediated phagocytosis. To  
317 do so, we compared phagocytosis of wild-type *S. aureus* strain Newman with Newman  
318  $\Delta spa/sbi$ . In addition, we complemented Newman  $\Delta spa/sbi$  with SpA, by overexpressing the  
319 *spa* gene from a plasmid (Newman  $\Delta spa/sbi$  + *pspa*). Correct overexpression of SpA on the *S.*  
320 *aureus* surface was validated by anti-SpA IgY antibodies and flow cytometry (**Fig. 3A**).  
321 Moreover, SpA functionality on the bacterial surface was confirmed by studying that an IgG1

322 isotype control (anti-2,4-dinitrophenol (DNP) antibody) can bind cell-surface-SpA-expressing  
323 strains (Newman WT and Newman  $\Delta spa/sbi + pspa$ ), but not Newman  $\Delta spa/sbi$  (**Fig. S2A**). As  
324 anticipated, anti-DNP IgG3 antibodies did not bind any of the Newman strains (**Fig. S2B**).  
325 Next, we compared phagocytosis of these three strains in the presence of monoclonal IgGs  
326 directed against WTA. After IgG1 and IgG3 were confirmed to similarly bind to the three  
327 Newman strains (**Fig. S2C, D**), we showed that IgG1-mediated phagocytosis was lower for the  
328 cell-surface-SpA-expressing strains than for the knockout strain (**Fig. 3B**). Notably, the  
329 inhibitory effect of SpA on phagocytosis was even more prominent when SpA was  
330 overexpressed (**Fig. 3B**). All three bacterial strains were efficiently phagocytized when labeled  
331 with anti-WTA IgG3 antibodies (**Fig. 3C**). Overall, these data suggest that, similar to soluble  
332 SpA, also cell-surface SpA reduce IgG-mediated phagocytosis of *S. aureus* by binding to the  
333 IgG-Fc region.

334

### 335 **Soluble, multi-domain SpA affects binding of bacterium-bound IgG1 to FcγRIIa and** 336 **FcγRIIIb, but not to FcγRI**

337 Since FcγRs are generally believed to be the main drivers of IgG-mediated phagocytosis, we  
338 studied whether SpA could interfere with IgG-FcγRs interactions. While neutrophils mainly  
339 express FcγRIIa and FcγRIIIb on their surface, FcγRI is found at low abundance (43, 44). Thus,  
340 we focus on the effect of SpA on IgG binding to these three FcγR classes. We performed  
341 binding assays of IgG1-labeled Newman  $\Delta spa/sbi$  to membrane-bound FcγRs using Chinese  
342 hamster ovary (CHO) cell lines that stably express single human FcγRs (37). These include  
343 FcγRI, FcγRIIa, and FcγRIIIb and the respective polymorphic variants (FcγRIIa H131, FcγRIIa  
344 R131, FcγRIIIb NA1 and FcγRIIIb NA2). We observed that the presence of the SpA constructs  
345 did not affect binding of IgG1-coated bacteria to hFcγRI-expressing CHO cells (**Fig. 4A** and  
346 **S3A**). However, the multi-domain SpA proteins reduced the binding of IgG1-labeled bacteria



347 to hFcγRIIa-expressing CHO cells (**Fig. 4B, C** and **S3B, C**) and to hFcγRIIIb-expressing CHO  
348 cells (**Fig. 4D, E** and **S3D, E**). Curiously, the single B domain also decreased the binding of  
349 IgG1-coated bacteria to hFcγRIIIb-expressing CHO cells, although less efficiently than multi-  
350 domain SpA (**Fig. 4D, E** and **S3D, E**). Of note, we confirmed that IgG1-bound bacteria were  
351 unable to bind untransfected CHO cells (**Fig. S3F, G**). Taken together, these results show that  
352 soluble SpA composed of five domains interferes with the binding of IgG1-coated bacteria to  
353 membrane bound FcγRIIa and FcγRIIIb, but not with FcγRI, and that SpA-B can only interfere  
354 with IgG-FcγRIIIb binding.

355

356 **Soluble, multi-domain SpA affects binding of soluble IgG1 to all FcγR classes, except**  
357 **FcγRI, when SpA is in excess**

358 While our assays with target-bound IgG1 indicate that multi-domain SpA blocks FcγRIIa-IgG1  
359 and FcγRIIIb-IgG1 interactions, a previous study showed that SpA does not compete with  
360 FcγRIIa to bind soluble IgG1 (26). Although it is more relevant to investigate how SpA  
361 competes with FcγR for binding to target-bound IgG than to soluble IgG, we also performed  
362 surface plasmon resonance (SPR) experiments to assess the effects of our defined SpA  
363 fragments on binding of soluble IgG1 to all FcγR classes and polymorphic variants. FcγRs were  
364 coupled to streptavidin biosensors and soluble IgG1 in presence or absence SpA were  
365 subsequently injected, at two different IgG:SpA molar ratios (1:1 and 1:5). Contrasting with  
366 what was previously reported (26), we found that the multi-domain SpA proteins reduced the  
367 interaction of IgG1 to all FcγRs coated on the chip, except to FcγRI, when 1:5 IgG:SpA molar  
368 ratio was used (**Fig. S4A**). SpA-B also did not decrease IgG-FcγR interaction (**Fig. S4A**). When  
369 instead of 1:5, we used a IgG:SpA molar ratio of 1:1, the presence of SpA altered the IgG-  
370 FcγRs binding kinetics, but did not reduce the interaction of IgG1 to any of the FcγRs spotted  
371 on the chip (**Fig. S4B**). In fact, under these conditions we found that the multi-domain SpA

372 constructs decreased the on-rates but also the off-rates and hence enhanced the stability of the  
373 IgG-Fc $\gamma$ R binding (**Fig. S4B**). Altogether, these results show that multi-domain SpA can still  
374 interfere with binding of soluble IgG1 to low-affinity Fc $\gamma$ R<sub>s</sub> when SpA is in excess in relation  
375 to soluble IgG, but not when IgG and SpA are added at an equimolar ratio.

376

### 377 **Soluble SpA inhibits IgG1-FcRn interactions**

378 Besides extracellular Fc $\gamma$ R<sub>s</sub>, neutrophils also express FcRn inside granular structures (2) (see  
379 **Fig. 1A**). The presence of FcRn in neutrophils was shown to be important for efficient IgG-  
380 mediated phagocytosis of pneumococci (2). We previously suggested that, upon binding of  
381 target-bound IgG to Fc $\gamma$ R<sub>s</sub> on the surface of neutrophils, FcRn is translocated to nascent  
382 phagosomes where the low pH promotes binding of FcRn to IgG and facilitates internalization  
383 of IgG-opsonized targets (2), additionally, it seems to further promote inflammation in  
384 autoimmunity (45). Since SpA and FcRn have an overlapping binding site on the IgG Fc-region  
385 (see **Fig. 1B**) and that an analog of the B domain of SpA (the Z domain) was shown to inhibit  
386 the binding of FcRn to soluble IgG (46), we also measured the impact of SpA on IgG-FcRn  
387 interactions.

388 We performed flow cytometry experiments in which bacterium-bound IgG1 alone or in  
389 combination with each of the SpA constructs, or FLIPr-like, were incubated with FcRn-coated  
390 beads at pH 6.0. As expected, all SpA variants reduced IgG1-FcRn interactions, although multi-  
391 domain SpA proteins were more effective than SpA-B (**Fig. 5A, B**).

392 We also tested whether there was a difference on the effect of SpA on IgG-FcRn binding when  
393 IgGs were in solution. We measured binding of soluble IgG1 to FcRn-coated beads in presence  
394 or absence of SpA and showed that all SpA variants reduced IgG1-FcRn interactions, although  
395 the single domain was less effective than multi-domain SpA proteins (**Fig. 5C, D**). Flow

396 cytometry measurements were corroborated by SPR experiments where biotinylated-FcRn was  
397 coupled to streptavidin sensors and soluble IgG1 alone or in combination with each of the SpA  
398 proteins was subsequently injected, using a IgG:SpA molar ratio of 1:5 (**Fig. 5E**). However,  
399 when IgG1 and SpA were injected at an equimolar ratio, SpA-B lost its ability to block IgG-  
400 FcRn interactions (**Fig. 5F**). Overall, these data indicate that SpA directly competes with FcRn  
401 for binding IgG and that SpA needs to bind to both Fc-binding sites of an IgG to prevent IgG-  
402 FcRn binding. Moreover, these results help to clarify how SpA blocks IgG-mediated  
403 phagocytosis.

404

#### 405 **Soluble and surface-bound SpA affect phagocytosis of *S. aureus* mediated by naturally** 406 **occurring antibodies**

407 Finally, we studied the effect of SpA on IgG-mediated phagocytosis in normal human serum  
408 (NHS) which contains naturally occurring antibodies against *S. aureus*. The serum was heat-  
409 inactivated (HI-NHS) to prevent complement activation. Although multi-domain SpA proteins  
410 were more effective than SpA-B, all SpA constructs reduced antibody-mediated phagocytosis  
411 (**Fig. 6A, B**), even though HI-NHS comprises many different antibodies, including antibodies  
412 that bind SpA at different regions (Fc and/or Fab domains), and also antibodies that do not bind  
413 SpA (as IgG3 and IgM from non VH3-type family). We also assessed the impact of cell-surface  
414 SpA in reducing phagocytosis in presence of HI-NHS. The efficiency of phagocytosis was  
415 reduced when neutrophils were challenged to engulf cell-surface-SpA-expressing strains, when  
416 compared with Newman  $\Delta spa/sbi$ , in particular when the SpA overexpressing Newman  
417  $\Delta spa/sba+pspa$  strain was used that resisted IgG-mediated phagocytosis (**Fig. 6C**). Altogether,  
418 these data show that SpA can block phagocytosis mediated by naturally occurring antibodies  
419 and that the single SpA-B domain is sufficient to affect it.

## 420 **Discussion**

421 Antibodies can help to resolve infections by inducing Fc-effector functions after binding to  
422 bacterial surfaces (1). The Fc domains of IgG-labeled bacteria are recognized by Fc $\gamma$ Rs that are  
423 expressed on the surface of innate immune cells, e.g. neutrophils, which engulf and kill bacteria  
424 intracellularly. Next to extracellular Fc $\gamma$ Rs, neutrophils also express FcRn intracellularly, which  
425 showed to facilitate IgG-mediated phagocytosis (2). In this study, we made two important  
426 discoveries that help to understand how SpA from *S. aureus* blocks IgG-mediated phagocytosis:  
427 first, we revealed that SpA interferes with the binding of IgG to Fc $\gamma$ RIIa and Fc $\gamma$ RIIIb; second,  
428 we found that SpA blocks the interaction between IgG and FcRn. Our findings contribute for a  
429 better understanding of the immune evasion mechanisms of *S. aureus*. Moreover, our study  
430 supports that FcRn, besides Fc $\gamma$ Rs, also has an important role in phagocytosis.

431 This work confirms that both soluble and cell-attached SpA efficiently block FcR-mediated  
432 phagocytosis of *S. aureus* by human neutrophils and, more importantly, it shows that this is  
433 because SpA blocks the binding of Fc $\gamma$ RIIa, Fc $\gamma$ RIIIb and FcRn to target-bound IgGs. Although  
434 SpA has been known to block phagocytosis for a long time (23), the molecular mechanism  
435 behind it was not clarified. While SpA was shown to block binding of IgG-labeled surfaces to  
436 Fc receptor-expressing cells (23, 25, 47), soluble murine Fc $\gamma$ RI and human Fc $\gamma$ RIIa were  
437 demonstrated not to compete with SpA for binding to IgG (26). Here, we confirm that SpA does  
438 not affect the binding of the high-affinity human Fc $\gamma$ RI to IgG1. However, we show that SpA  
439 decreases the binding of the low-affinity receptors Fc $\gamma$ RIIa and Fc $\gamma$ RIIIb to IgG1. These  
440 conflicting results might be explained by the fact that, instead of soluble Fc $\gamma$ Rs, we use surface-  
441 bound Fc $\gamma$ Rs as they better resemble membrane Fc $\gamma$ Rs. Soluble Fc $\gamma$ Rs are likely less  
442 constrained in their mobility, which may facilitate their binding to SpA-bound IgG molecules.  
443 It has been presumed that SpA, by binding antibodies, would simply sequester their Fc sites  
444 and, thus, preclude Fc recognition by phagocytic cells (23, 47, 48). Here, we clarify that the

445 binding of SpA to IgG1 likely causes a suboptimal sterical conformation that affects the binding  
446 of low-affinity Fc $\gamma$ R<sub>s</sub> but not high-affinity Fc $\gamma$ R<sub>s</sub>. Importantly, we show that SpA also prevents  
447 FcRn from binding IgG. Contrarily to Fc $\gamma$ R<sub>s</sub>, that bind IgG-Fc in a structurally distant site from  
448 the SpA binding site, FcRn interacts with IgG at the exact same site as SpA. Thus, while SpA-  
449 IgG interactions likely prevent binding of Fc $\gamma$ R<sub>s</sub> due to steric hindrance, FcRn should compete  
450 directly with SpA for binding IgG. Although an analog of the B domain of SpA (the Z domain)  
451 was previously shown to inhibit the binding of FcRn to soluble IgG (46), here we associate the  
452 effect of SpA on blocking IgG-FcRn interactions with its anti-phagocytic properties.  
453 Importantly, by blocking binding of FcRn to IgG, SpA may also interfere with other important  
454 functions of FcRn. In addition to its role in IgG-phagocytosis by neutrophils (2), FcRn also  
455 mediates the transfer of IgG from the mother to her fetus (49) and extends the serum half-life  
456 of IgG (5, 50). More recently, FcRn was also found to regulate antigen presentation (51),  
457 antigen cross-presentation (52, 53) and secretion of cytotoxicity-promoting cytokines by  
458 dendritic cells (52). Therefore, we expect that SpA has a much broader immunomodulatory  
459 action than initially anticipated.

460 This study also provides a rationale for the multiplicity of repeating Ig-binding domains of SpA  
461 produced by *S. aureus*. In fact, we show that SpA needs to be composed of multiple Ig-binding  
462 domains to efficiently block IgG1-mediated phagocytosis and to decrease the binding of IgG1  
463 to Fc $\gamma$ RIIIa-coated surfaces. It is possible that a multi-domain SpA molecule that is bound to  
464 IgG1-opsonized bacteria can still bind to soluble IgGs, forming IgG-SpA complexes that make  
465 IgG-Fc tails inaccessible to Fc $\gamma$ R<sub>s</sub>. However, experiments where the bacteria were first  
466 incubated with IgGs and then washed suggest that SpA binds to bacterium-bound IgGs to block  
467 IgG-Fc $\gamma$ R<sub>s</sub> interactions and, consequently, phagocytosis. Thus, a more plausible hypothesis is  
468 that SpA needs multiple IgG-binding domains to cause steric hindrance and mask the Fc $\gamma$ R  
469 binding site on IgG1-opsonized bacteria. This hypothesis is supported by the fact that SpA

470 composed of five domains binds IgG with a 1:1 stoichiometry (21), which suggests that two of  
471 the five domains of SpA bind to both sites of IgG-Fc, leaving the other three domains free to  
472 cover the region in IgG where FcγRs bind. However, this theory does not explain why the single  
473 SpA-B domain affects IgG-FcγRIIIb binding. We speculate that this is a consequence of a slight  
474 change to the CH2 configuration of the IgG that is induced by the binding of SpA-B, which has  
475 a particularly strong impact (relative) on the lowest-affinity FcγR.

476 Although further studies are needed to clarify how SpA-B affects IgG2- and IgG4-mediated  
477 phagocytosis and whether the target of the antibody influences FcγR and/or FcRn recognition,  
478 we suggest that SpA-B may be used as a research tool to assess which FcR(s) drive IgG-  
479 mediated phagocytosis. Because the effect of SpA-B on phagocytosis mediated by anti-WTA  
480 IgG1 was very minor, it is likely that this antibody mediates phagocytosis mainly by triggering  
481 FcγRIIIa. Conversely, since the single SpA-B domain was sufficient to effectively reduce  
482 phagocytosis mediated by naturally occurring antibodies, FcRn and/or FcγRIIIb may play a  
483 more essential role in the phagocytosis mediated by other antibody types.

484 Around 85% of SpA produced by *S. aureus* is anchored to the cell wall of the bacteria (14). We  
485 envision that cell attached SpA might inhibit IgG-mediated phagocytosis of *S. aureus* by the  
486 same mechanisms described here for soluble SpA. However, we also speculate that cell attached  
487 SpA could induce an additional inhibitory mechanism by covering *S. aureus* surface with  
488 antibodies, creating a shield that prevents anti-*S. aureus* antibodies from reaching the bacterial  
489 surface and/or that masks their binding sites, as suggested before (23). Another hypothesis is  
490 that their binding sites are already occupied by antibodies that simultaneously bind to cell-  
491 surface SpA (via Fc-domain) and to their target antigen on the bacterial surface (via Fab-  
492 domain), the so-called phenomenon “bipolar bridging”.

493 Our study also provides a rational for the design of therapeutic antibodies against  
494 staphylococcal infections. In line with our previous study (21), we show here that IgG3

495 antibodies are unaffected by the presence of SpA, and thus are more potent to mediate  
496 phagocytosis and killing of *S. aureus* by neutrophils than IgG1. Therefore, we suggest that  
497 monoclonal antibodies against *S. aureus* surface should be developed as IgG3 antibodies. The  
498 fact that IgG3 antibodies are the most effective IgG subclass to trigger immune effector  
499 functions also supports this selection.

500 In conclusion, this study unveils how SpA blocks IgG-mediated phagocytosis, which improves  
501 our understanding of the immune evasion strategies of *S. aureus* and may help the development  
502 of therapeutic options to tackle staphylococcal infections.

503 **Acknowledgments**

504 We thank Dr. Annette M. Stemerding for fruitful discussions.

505

506 **Funding**

507 This work was supported by the European Union's Horizon 2020 research programs H2020-  
508 MSCA-ITN #675106 to JAGS, ERC Starting grant #639209 to SHMR, DFG-CRC1181-A07  
509 to FN and FOR 2886 to FN and AL.

510

511 **Conflict of interest**

512 ARC participated in a postgraduate studentship program at GSK. KPMK and SHMR are co-  
513 inventor on a patent describing antibody therapies against *Staphylococcus aureus*.

514

515 **Figures legends**

516 **Figure 1. Neutrophils express FcγRs and FcRn that recognize IgG-Fcs in structurally**  
517 **distant sites.** (A) Schematic representation of an IgG-labeled bacterium being phagocytized by  
518 a neutrophil, showing binding of extracellular FcγRs to IgGs and FcRn inside granular  
519 structures. (B) Schematic illustration of IgG indicating the binding regions of staphylococcal  
520 protein A (SpA), FcγRs and FcRn. FcγRs bind to the lower hinge and CH2 domain of IgG with  
521 a 1:1 stoichiometry while SpA and FcRn bind to the CH2-CH3 interface with a 1:1 and 2:1  
522 stoichiometry, respectively.

523

524 **Figure 2. Soluble SpA requires multiple domains to effectively block IgG1-mediated**  
525 **phagocytosis and killing of S. aureus.** (A) Schematic representation of SpA precursor and



526 recombinant SpA proteins used in this study. Unprocessed SpA consists of a signal sequence,  
527 five Ig-binding domains (E, D, A, B, and C), an X region and a sorting region. The recombinant  
528 SpA proteins used here include solely the Ig-binding domains. While SpA-WT is composed of  
529 five different Ig-binding domains, SpA-B contains a single B domain and SpA-5xB consists of  
530 five repeating B domains. (B) Phagocytosis of *S. aureus* Newman  $\Delta spa/sbi$  after incubation of  
531 bacteria with a concentration range of anti-WTA IgG1, followed by buffer (grey), 200 nM of  
532 SpA-B (green), SpA-WT (blue), SpA-5xB (pink) or FLIPr-like (orange), measured by flow-  
533 cytometry. Bacteria were washed after incubation with IgGs to remove unbound IgG and only  
534 after buffer, SpA or FLIPr-like was added. (C, D) Phagocytosis of *S. aureus* Newman  $\Delta spa/sbi$   
535 after incubation of bacteria with a concentration range of anti-WTA IgG1 (C) or IgG3 (D), in  
536 absence (buffer; grey) or presence of 200 nM soluble SpA-B (green), SpA-WT (blue), SpA-  
537 5xB (pink) or FLIPr-like (orange), measured by flow-cytometry. Bacteria, IgG and buffer, SpA  
538 or FLIPr-like were incubated at the same step. (E, F) CFU enumeration of Newman  $\Delta spa/sbi$   
539 after incubation with anti-WTA IgG1 (E) or IgG3 (F) in absence (buffer; grey) or presence of  
540 200 nM SpA-B (green) or SpA-WT (blue), followed by incubation with human neutrophils.  
541 Bacteria, IgG and buffer, SpA or FLIPr-like were incubated at the same step. Data are presented  
542 as % of mAm<sup>+</sup> PMNs  $\pm$  SD of three (B, C) or two (D) independent experiments, or as log<sub>10</sub>  
543 CFU/mL  $\pm$  SD of three independent experiments (E, F). Statistical analysis was performed  
544 using one-way ANOVA to compare buffer condition with SpA-B, SpA-WT, SpA-5xB and  
545 FLIPr-like conditions and displayed only when significant as \*P  $\leq$  0.05; \*\*P  $\leq$  0.01; \*\*\*P  $\leq$   
546 0.001; \*\*\*\*P  $\leq$  0.0001.

547

548 **Figure 3. Cell-anchored SpA blocks IgG-mediated phagocytosis of *S. aureus* by binding**  
549 **to IgG-Fc domains.** (A) SpA expression on the surface of Newman  $\Delta spa/sbi$ , Newman WT,  
550 and Newman  $\Delta spa/sbi + pspa$ , detected with biotinylated-anti-SpA IgY, by flow cytometry; (B,

551 C) Phagocytosis of *S. aureus* Newman  $\Delta spa/sbi$ , Newman WT and Newman  $\Delta spa/sbi + pspa$   
552 strains after incubation of bacteria with a concentration range of anti-WTA IgG1 (B), or IgG3  
553 (C), measured by flow-cytometry. Data are presented as geometric mean fluorescence intensity  
554 (GeoMFI)  $\pm$  SD of two independent experiments (A), or as % of mAm<sup>+</sup> PMNs or FITC<sup>+</sup> PMNs  
555  $\pm$  SD of three independent experiments (B, C). (B, C) Statistical analysis was performed using  
556 one-way ANOVA to compare Newman  $\Delta spa/sbi$  conditions with Newman WT and Newman  
557  $\Delta spa/sbi + pspa$  conditions and displayed only when significant as \*P  $\leq$  0.05; \*\*\*\*P  $\leq$  0.0001.  
558

559 **Figure 4. Soluble multi-domain SpA inhibits binding of Fc $\gamma$ RIIa and Fc $\gamma$ RIIIb to target-**  
560 **bound IgG1.** (A-E) Binding of anti-WTA IgG1-labeled *S. aureus* Newman  $\Delta spa/sbi$  to hFc $\gamma$ RI-  
561 (A), hFc $\gamma$ RIIa H131- (B), hFc $\gamma$ RIIa R131- (C), hFc $\gamma$ RIIIb NA1- (D) and to hFc $\gamma$ RIIIb NA2-  
562 expressing CHO cells (E) in absence (buffer; grey) or presence of 200 nM of SpA-B (green),  
563 SpA-WT (blue), SpA-5xB (pink) or FLIPr-like (orange), detected by flow-cytometry. Bacteria  
564 were washed after incubation with IgG1 to remove unbound antibodies and only after buffer,  
565 SpA or FLIPr-like was added. Data are presented as % of mAm<sup>+</sup> CHO cells  $\pm$  SD of at least  
566 three independent experiments. Statistical analysis was performed using one-way ANOVA to  
567 compare buffer condition with SpA-B, SpA-WT, SpA-5xB and FLIPr-like conditions and  
568 displayed only when significant as \*P  $\leq$  0.05; \*\*P  $\leq$  0.01; \*\*\*P  $\leq$  0.001.

569  
570 **Figure 5. Soluble SpA inhibits binding of FcRn to target-bound and soluble IgG1.** (A)  
571 Binding of anti-WTA IgG1-labeled *S. aureus* Newman  $\Delta spa/sbi$  to FcRn-coated beads at pH  
572 6.0 in absence (buffer; grey) or presence of 200 nM of SpA-B (green), SpA-WT (blue) or SpA-  
573 5xB (pink), detected with Alexa Fluor<sup>647</sup>-conjugated goat F(ab')<sub>2</sub> anti-human kappa by flow-  
574 cytometry. (B) Binding of anti-WTA IgG1-labeled *S. aureus* Newman  $\Delta spa/sbi$  bound to FcRn-  
575 coated beads in presence of a concentration range of SpA-B (green), SpA-WT (blue) or SpA-

576 5xB (pink), using 10 nM IgG1, detected with Alexa Fluor<sup>647</sup>-conjugated goat F(ab')<sub>2</sub> anti-  
577 human kappa by flow-cytometry. (C) Binding of a concentration range of IgG1 to FcRn-coated  
578 beads in absence (buffer; grey) or presence of 200 nM SpA-B (green), SpA-WT (blue), SpA-  
579 5xB (pink) or FLIPr-like (orange), detected with Alexa Fluor<sup>647</sup>-conjugated goat F(ab')<sub>2</sub> anti-  
580 human kappa by flow-cytometry. Statistical analysis was performed using one-way ANOVA  
581 to compare buffer condition with SpA-B, SpA-WT, SpA-5xB and FLIPr-like conditions and  
582 displayed only when significant as \*P ≤ 0.05. (D) Binding of 10 nM of IgG1 to FcRn-coated  
583 beads in presence of a concentration range of SpA-B (green), SpA-WT (blue), SpA-5xB (pink)  
584 or FLIPr-like (orange), detected with Alexa Fluor<sup>647</sup>-conjugated goat F(ab')<sub>2</sub> anti-human kappa  
585 by flow-cytometry. (E, F) Sensorgram of SPR measurement for binding of 200 nM of IgG1 to  
586 FcRn in absence (buffer; grey) or presence of 1 μM (E) or 200 nM (F) of SpA-B (green), SpA-  
587 WT (blue) or SpA-5xB (pink). FcRn was first spotted on the sensor and after IgG1 alone or in  
588 combination with SpA-B, SpA-WT or SpA-5xB was injected at pH 6.0. Data are presented as  
589 mean ± SD of two (A, B, D) or three (C) independent experiments or as response units (RU) of  
590 a representative experiment of two independent experiments (E, F).

591

592 **Figure 6. Soluble SpA blocks phagocytosis of *S. aureus* mediated by naturally occurring**  
593 **antibodies.** (A) Phagocytosis of *S. aureus* Newman  $\Delta spa/sbi$  after incubation of bacteria with  
594 a concentration range of heat inactivated human normal serum (HI-NHS), in absence (buffer;  
595 grey) or presence of 200 nM soluble SpA-B (green), SpA-WT (blue), SpA-5xB (pink) or FLIPr-  
596 like (orange), measured by flow-cytometry. Bacteria, IgG and Buffer/SpA were incubated at  
597 the same step. Statistical analysis was performed using one-way ANOVA to compare buffer  
598 condition with SpA-B, SpA-WT, SpA-5xB and FLIPr-like conditions and displayed only when  
599 significant as \*P ≤ 0.05; \*\*P ≤ 0.01; \*\*\*P ≤ 0.001; \*\*\*\*P ≤ 0.0001. (B) Phagocytosis of *S.*  
600 *aureus* Newman  $\Delta spa/sbi$  after incubation of bacteria with 1% HI-NHS in presence of a

601 concentration range of SpA-B (green), SpA-WT (blue) or SpA-5xB (pink), measured by flow-  
602 cytometry. Bacteria, IgG and Buffer/SpA were incubated at the same step. The black dotted  
603 line shows the background fluorescence from bacteria that were not incubated with IgG. (C)  
604 Phagocytosis of *S. aureus* Newman  $\Delta spa/sbi$ , Newman WT and Newman  $\Delta spa/sbi + pspa$   
605 strains after incubation of bacteria with a concentration range of HI-NHS, measured by flow-  
606 cytometry. Statistical analysis was performed using one-way ANOVA to compare Newman  
607  $\Delta spa/sbi$  conditions with Newman WT and Newman  $\Delta spa/sbi + pspa$  conditions and displayed  
608 only when significant as \* $P \leq 0.05$ ; \*\* $P \leq 0.01$ ; \*\*\* $P \leq 0.001$ . Data are presented as % of mAm<sup>+</sup>  
609 PMNs  $\pm$  SD or FITC<sup>+</sup> PMNs  $\pm$  SD of three (A, C) or two (B) independent experiments.

610 **References**

- 611 1. Lu, L. L., T. J. Suscovich, S. M. Fortune, and G. Alter. 2018. Beyond binding: Antibody  
612 effector functions in infectious diseases. *Nat. Rev. Immunol.* 18: 46–61.
- 613 2. Vidarsson, G., A. M. Stemerding, N. M. Stapleton, S. E. Splethoff, H. Janssen, F. E.  
614 Rebers, M. De Haas, and J. G. Van De Winkel. 2006. FcRn: An IgG receptor on phagocytes  
615 with a novel role in phagocytosis. *Blood* 108: 3573–3579.
- 616 3. Story, C. M., J. E. Mikulska, and N. E. Simister. 1994. A major histocompatibility complex  
617 class I-like Fc receptor cloned from human placenta: Possible role in transfer of  
618 immunoglobulin G from mother to fetus. *J. Exp. Med.* 180: 2377–2381.
- 619 4. Israel, E. J., D. F. Wilsker, K. C. Hayes, D. Schoenfeld, and N. E. Simister. 1996. Increased  
620 clearance of IgG in mice that lack  $\beta$ 2-microglobulin: Possible protective role of FcRn.  
621 *Immunology* 89: 573–578.
- 622 5. Ghetie, V., J. G. Hubbard, J. K. Kim, M. F. Tsen, Y. Lee, and E. S. Ward. 1996.  
623 Abnormally short serum half-lives of IgG in  $\beta$ 2-microglobulin-deficient mice. *Eur. J.*  
624 *Immunol.* 26: 690–696.
- 625 6. Zhu, X., G. Meng, B. L. Dickinson, X. Li, E. Mizoguchi, L. Miao, Y. Wang, C. Robert, B.  
626 Wu, P. D. Smith, W. I. Lencer, and R. S. Blumberg. 2001. MHC Class I-Related Neonatal Fc  
627 Receptor for IgG Is Functionally Expressed in Monocytes, Intestinal Macrophages, and  
628 Dendritic Cells. *J. Immunol.* 166: 3266–3276.
- 629 7. Caaveiro, J. M. M., M. Kiyoshi, and K. Tsumoto. 2015. Structural analysis of Fc/Fc $\gamma$ R  
630 complexes: A blueprint for antibody design. *Immunol. Rev.* 268: 201–221.
- 631 8. Sánchez, L. M., D. M. Penny, and P. J. Bjorkman. 1999. Stoichiometry of the interaction  
632 between the major histocompatibility- complex-related Fc receptor and its Fc ligand.  
633 *Biochemistry* 38: 9471–9476.

- 634 9. Abdiche, Y. N., Y. A. Yeung, J. Chaparro-Riggers, I. Barman, P. Strop, S. M. Chin, A.  
635 Pham, G. Bolton, D. McDonough, K. Lindquist, J. Pons, and A. Rajpal. 2015. The neonatal  
636 Fc receptor (FcRn) binds independently to both sites of the IgG homodimer with identical  
637 affinity. *MAbs* 7: 331–343.
- 638 10. West, A. P., and P. J. Bjorkman. 2000. Crystal structure and immunoglobulin G binding  
639 properties of the human major histocompatibility complex-related Fc receptor. *Biochemistry*  
640 39: 9698–9708.
- 641 11. Rodewald, R. 1976. pH-dependent binding of immunoglobulins to intestinal cells of the  
642 neonatal rat. *J. Cell Biol.* 71: 666–670.
- 643 12. Sidorin, E. V., and T. F. Solov'Eva. 2011. IgG-binding proteins of bacteria. *Biochem.* 76:  
644 295–308.
- 645 13. Lowy, F. 1998. Staphylococcus aureus infections. *N. Engl. J. Med.* 339: 520–532.
- 646 14. Becker, S., M. B. Frankel, O. Schneewind, and D. Missiakas. 2014. Release of protein A  
647 from the cell wall of Staphylococcus aureus. *Proc. Natl. Acad. Sci. U. S. A.* 111: 1574–1579.
- 648 15. O'Halloran, D. P., K. Wynne, and J. A. Geoghegan. 2015. Protein A is released into the  
649 Staphylococcus aureus culture supernatant with an unprocessed sorting signal. *Infect. Immun.*  
650 83: 1598–1609.
- 651 16. Deisenhofer, J. 1981. Crystallographic Refinement and Atomic Models of a Human Fc  
652 Fragment and Its Complex with Fragment B of Protein A from Staphylococcus aureus at 2.9-  
653 and 2.8-Å Resolution. *Biochemistry* 20: 2361–2370.
- 654 17. Graille, M., E. A. Stura, A. L. Corper, B. J. Sutton, M. J. Taussig, J. B. Charbonnier, and  
655 G. J. Silverman. 2000. Crystal structure of a Staphylococcus aureus protein a domain  
656 complexed with the Fab fragment of a human IgM antibody: Structural basis for recognition  
657 of B-cell receptors and superantigen activity. *Proc. Natl. Acad. Sci. U. S. A.* 97: 5399–5404.

- 658 18. Loghem, E. Van, B. Frangione, B. Recht, and E. C. Franklin. 1982. Staphylococcal  
659 protein A and human IgG subclasses and allotypes. *Scand J Immunol* 15: 275–278.
- 660 19. Jendeberg, L., P. Nilsson, A. Larsson, P. Denker, M. Uhlén, B. Nilsson, and P. Å. Nygren.  
661 1997. Engineering of Fc1 and Fc3 from human immunoglobulin G to analyse subclass  
662 specificity for staphylococcal protein A. *J. Immunol. Methods* 201: 25–34.
- 663 20. Taeye, S. W. de, A. E. H. Bentlage, M. M. Mebius, J. I. Meesters, L.-T. Suzanne, D.  
664 Falck, T. Sénard, N. Salehi1, M. Wuhrer, J. Schuurman, A. F. Labrijn, T. Rispens, and G.  
665 Vidarsson. 2020. FcγR Binding and ADCC Activity of Human IgG Allotypes. *Front.*  
666 *Immunol.* 11.
- 667 21. Cruz, A. R., M. A. den Boer, J. Strasser, S. A. Zwarthoff, F. J. Beurskens, C. J. C. de  
668 Haas, P. C. Aerts, G. Wang, R. N. de Jong, F. Bagnoli, J. A. G. van Strijp, K. P. M. van  
669 Kessel, J. Schuurman, J. Preiner, A. J. R. Heck, and S. H. M. Rooijackers. 2021.  
670 Staphylococcal protein A inhibits complement activation by interfering with IgG hexamer  
671 formation. *Proc. Natl. Acad. Sci. U. S. A.* 118: e2016772118.
- 672 22. Falugi, F., H. K. Kim, D. M. Missiakas, and O. Schneewind. 2013. Role of protein a in the  
673 evasion of host adaptive immune responses by *Staphylococcus aureus*. *MBio* 4: e00575-13.
- 674 23. Dossett, J. H., G. Kronvall, R. C. Williams, and P. G. Quie. 1969. Antiphagocytic effects  
675 of staphylococcal protein A. *J. Immunol.* 103: 1405–10.
- 676 24. Diebolder, C. A., F. J. Beurskens, R. N. De Jong, R. I. Koning, K. Strumane, M. A.  
677 Lindorfer, M. Voorhorst, D. Ugurlar, S. Rosati, A. J. R. Heck, J. G. J. Van De Winkel, I. A.  
678 Wilson, A. J. Koster, R. P. Taylor, E. O. Saphire, D. R. Burton, J. Schuurman, P. Gros, and P.  
679 W. H. I. Parren. 2014. Complement is activated by IgG hexamers assembled at the cell  
680 surface. *Science* 343: 1260–1263.
- 681 25. Sulica, A., C. Medesan, M. Laky, D. Onică, J. Sjöquist, and V. Ghetie. 1979. Effect of

- 682 protein A of *Staphylococcus aureus* on the binding of monomeric and polymeric IgG to Fc  
683 receptor-bearing cells. *Immunology* 38: 173–179.
- 684 26. Wines, B. D., M. S. Powell, P. W. H. I. Parren, N. Barnes, and P. M. Hogarth. 2000. The  
685 IgG Fc Contains Distinct Fc Receptor (FcR) Binding Sites: The Leukocyte Receptors FcγRI  
686 and FcγRIIa Bind to a Region in the Fc Distinct from That Recognized by Neonatal FcR and  
687 Protein A. *J. Immunol.* 164: 5313–5318.
- 688 27. Gonzalez, M. L., M. B. Frank, P. A. Ramsland, J. S. Hanas, and F. J. Waxman. 2003.  
689 Structural analysis of IgG2A monoclonal antibodies in relation to complement deposition and  
690 renal immune complex deposition. *Mol. Immunol.* 40: 307–317.
- 691 28. Lehar, S. M., T. Pillow, M. Xu, L. Staben, K. K. Kajihara, R. Vandlen, L. DePalatis, H.  
692 Raab, W. L. Hazenbos, J. Hiroshi Morisaki, J. Kim, S. Park, M. Darwish, B. C. Lee, H.  
693 Hernandez, K. M. Loyet, P. Lupardus, R. Fong, D. Yan, C. Chalouni, E. Luis, Y. Khalfin, E.  
694 Plise, J. Cheong, J. P. Lyssikatos, M. Strandh, K. Koefoed, P. S. Andersen, J. A. Flygare, M.  
695 Wah Tan, E. J. Brown, and S. Mariathasan. 2015. Novel antibody-antibiotic conjugate  
696 eliminates intracellular *S. aureus*. *Nature* 527: 323–328.
- 697 29. Vink, T., M. Oudshoorn-Dickmann, M. Roza, J. J. Reitsma, and R. N. de Jong. 2014. A  
698 simple, robust and highly efficient transient expression system for producing antibodies.  
699 *Methods* 65: 5–10.
- 700 30. Prat, C., P.-J. Haas, J. Bestebroer, C. J. C. de Haas, J. A. G. van Strijp, and K. P. M. van  
701 Kessel. 2009. A Homolog of Formyl Peptide Receptor-Like 1 (FPRL1) Inhibitor from  
702 *Staphylococcus aureus* (FPRL1 Inhibitory Protein) That Inhibits FPRL1 and FPR . *J.*  
703 *Immunol.* 183: 6569–6578.
- 704 31. Jeong, H. J., G. C. Abhiraman, C. M. Story, J. R. Ingram, and S. K. Dougan. 2017.  
705 Generation of Ca<sup>2+</sup>-independent sortase A mutants with enhanced activity for protein and cell



- 706 surface labeling. *PLoS One* 12: 1–15.
- 707 32. Boero, E., I. Brinkman, T. Juliet, E. van Yperen, J. A. G. van Strijp, S. H. M. Rooijackers,  
708 and K. P. M. van Kessel. 2021. Use of Flow Cytometry to Evaluate Phagocytosis of  
709 *Staphylococcus aureus* by Human Neutrophils. *Front. Immunol.* 12: 1–15.
- 710 33. De Jong, N. W. M., T. Van Der Horst, J. A. G. Van Strijp, and R. Nijland. 2017.  
711 Fluorescent reporters for markerless genomic integration in *Staphylococcus aureus*. *Sci. Rep.*  
712 7: 1–10.
- 713 34. Pang, Y. Y., J. Schwartz, M. Thoendel, L. W. Ackermann, A. R. Horswill, and W. M.  
714 Nauseef. 2010. Agr-dependent interactions of *Staphylococcus aureus* USA300 with human  
715 polymorphonuclear neutrophils. *J. Innate Immun.* 2: 546–559.
- 716 35. Surewaard, B. G. J., J. A. G. van Strijp, and R. Nijland. 2013. Studying interactions of  
717 *Staphylococcus aureus* with neutrophils by flow cytometry and time lapse microscopy. *J. Vis.*  
718 *Exp.* 1–5.
- 719 36. Dekkers, G., A. E. H. Bentlage, T. C. Stegmann, H. L. Howie, S. Lissenberg-Thunnissen,  
720 J. Zimring, T. Rispens, and G. Vidarsson. 2017. Affinity of human IgG subclasses to mouse  
721 Fc gamma receptors. *MAbs* 9: 767–773.
- 722 37. Lux, A., X. Yu, C. N. Scanlan, and F. Nimmerjahn. 2013. Impact of Immune Complex  
723 Size and Glycosylation on IgG Binding to Human FcγRs. *J. Immunol.* 190: 4315–4323.
- 724 38. Zhang, L., K. Jacobson, J. Vasi, M. Lindberg, and L. Frykberg. 1998. A second IgG-  
725 binding protein in *Staphylococcus aureus*. *Microbiology* 144: 985–991.
- 726 39. Brown, S., J. P. Santa Maria, and S. Walker. 2013. Wall Teichoic Acids of Gram-Positive  
727 Bacteria. *Annu. Rev. Microbiol.* 67: 313–336.
- 728 40. Stemerding, A. M., J. Köhl, M. K. Pandey, A. Kuipers, J. H. Leusen, P. Boross, M.

- 729 Nederend, G. Vidarsson, A. Y. L. Weersink, J. G. J. van de Winkel, K. P. M. van Kessel, and  
730 J. A. G. van Strijp. 2013. Staphylococcus aureus Formyl Peptide Receptor–like 1 Inhibitor  
731 (FLIPr) and Its Homologue FLIPr-like Are Potent FcγR Antagonists That Inhibit IgG-  
732 Mediated Effector Functions . *J. Immunol.* 191: 353–362.
- 733 41. Fong, R., K. Kajihara, M. Chen, I. Hotzel, S. Mariathasan, W. L. W. Hazenbos, and P. J.  
734 Lupardus. 2018. Structural investigation of human S. aureus-targeting antibodies that bind  
735 wall teichoic acid. *MAbs* 10: 979–991.
- 736 42. Nathan, C. 2006. Neutrophils and immunity: Challenges and opportunities. *Nat. Rev.*  
737 *Immunol.* 6: 173–182.
- 738 43. Wang, Y., and F. Jönsson. 2019. Expression, role, and regulation of neutrophil Fcγ  
739 receptors. *Front. Immunol.* 10: 1–13.
- 740 44. Kerntke, C., F. Nimmerjahn, and M. Biburger. 2020. There Is (Scientific) Strength in  
741 Numbers: A Comprehensive Quantitation of Fc Gamma Receptor Numbers on Human and  
742 Murine Peripheral Blood Leukocytes. *Front. Immunol.* 11: 1–17.
- 743 45. Hubbard, J. J., M. Pyzik, T. Rath, L. K. Kozicky, K. M. K. Sand, A. K. Gandhi, A.  
744 Grevys, S. Foss, S. C. Menzies, J. N. Glickman, E. Fiebiger, D. C. Roopenian, I. Sandlie, J. T.  
745 Andersen, L. M. Sly, K. Baker, and R. S. Blumberg. 2020. FcRn is a CD32a coreceptor that  
746 determines susceptibility to IgG immune complex-driven autoimmunity. *J. Exp. Med.* 217.
- 747 46. Raghavan, M., M. Y. Chen, L. N. Gastinel, and P. J. Bjorkman. 1994. Investigation of the  
748 interaction between the class I MHC-related Fc receptor and its immunoglobulin G ligand.  
749 *Immunity* 1: 303–315.
- 750 47. Rosenblatt, J., P. M. Zeltzer, J. Portaro, and R. C. Seeger. 1977. Inhibition of Antibody-  
751 Dependent Cellular Cytotoxicity by Protein A from Staphylococcus Aureus. *J. Immunol.* 118:  
752 981–985.

- 753 48. Kobayashi, S. D., and F. R. DeLeo. 2013. Staphylococcus aureus protein A promotes  
754 immune suppression. *MBio* 4.
- 755 49. Simister, N. E., and K. E. Mostov. 1989. An Fc receptor structurally related to MHC class  
756 I antigens. *Nature* 337: 184–187.
- 757 50. Junghans, R. P., and C. L. Anderson. 1996. The protection receptor for IgG catabolism is  
758 the  $\beta$ 2-microglobulin-containing neonatal intestinal transport receptor. *Proc. Natl. Acad. Sci.*  
759 *U. S. A.* 93: 5512–5516.
- 760 51. Qiao, S. W., K. Kobayashi, F. E. Johansen, L. M. Sollid, J. T. Andersen, E. Milford, D. C.  
761 Roopenian, W. I. Lencer, and R. S. Blumberg. 2008. Dependence of antibody-mediated  
762 presentation of antigen on FcRn. *Proc. Natl. Acad. Sci. U. S. A.* 105: 9337–9342.
- 763 52. Baker, K., T. Rath, M. B. Flak, J. C. Arthur, Z. Chen, J. N. Glickman, I. Zlobec, E.  
764 Karamitopoulou, M. D. Stachler, R. D. Odze, W. I. Lencer, C. Jobin, and R. S. Blumberg.  
765 2013. Neonatal Fc Receptor Expression in Dendritic Cells Mediates Protective Immunity  
766 against Colorectal Cancer. *Immunity* 39: 1095–1107.
- 767 53. Baker, K., S. W. Qiao, T. T. Kuo, V. G. Aveson, B. Platzer, J. T. Andersen, I. Sandlie, Z.  
768 Chen, C. De Haar, W. I. Lencer, E. Fiebiger, and R. S. Blumberg. 2011. Neonatal Fc receptor  
769 for IgG (FcRn) regulates cross-presentation of IgG immune complexes by CD8-CD11b+  
770 dendritic cells. *Proc. Natl. Acad. Sci. U. S. A.* 108: 9927–9932.

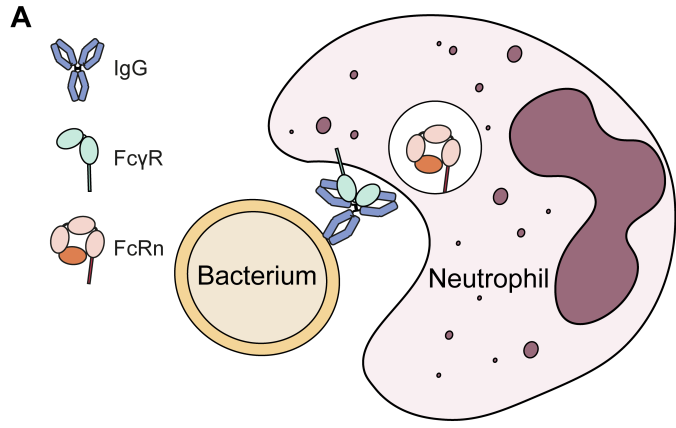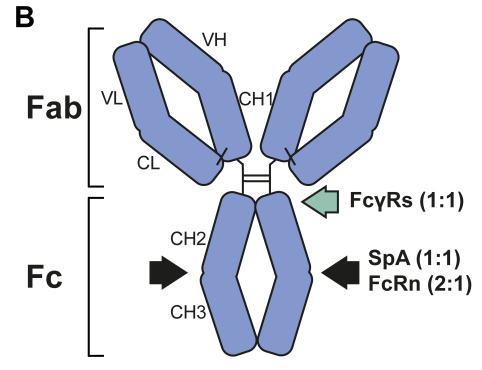

**A**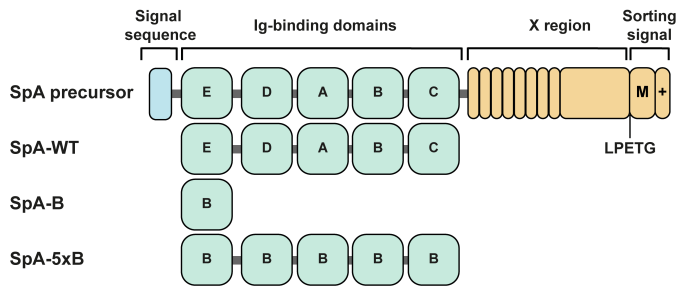**B**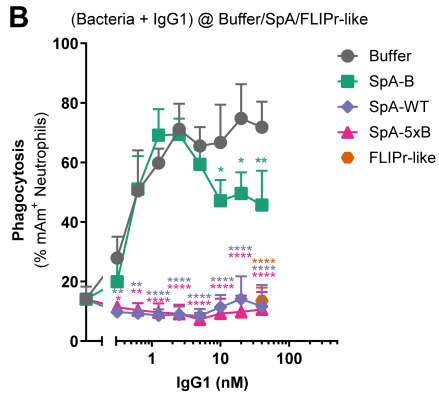**C**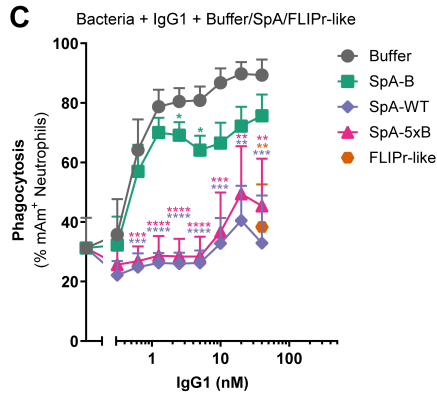**D**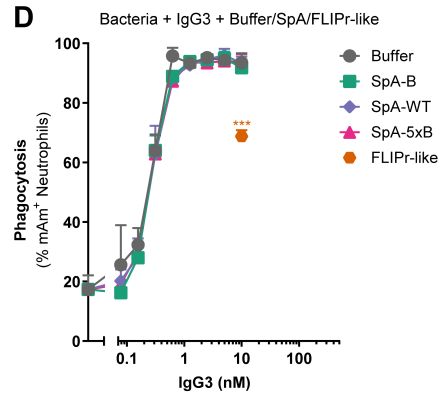**E**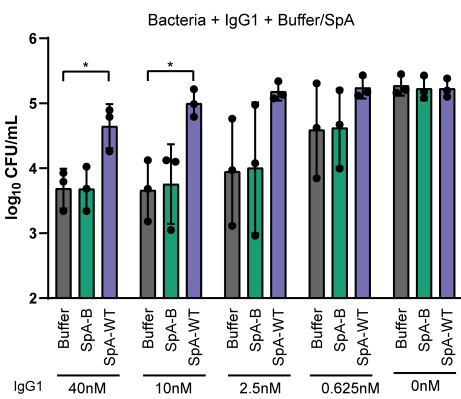**F**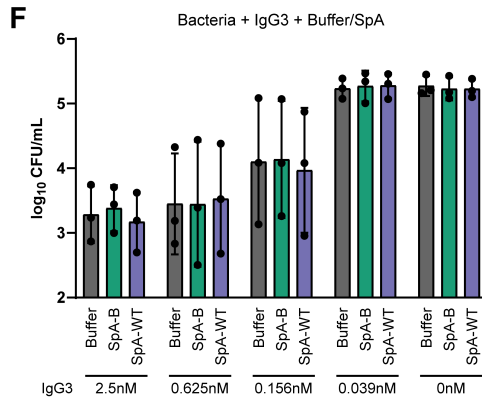

**A**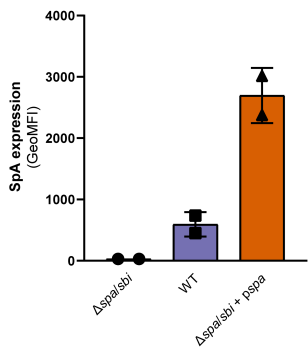**B**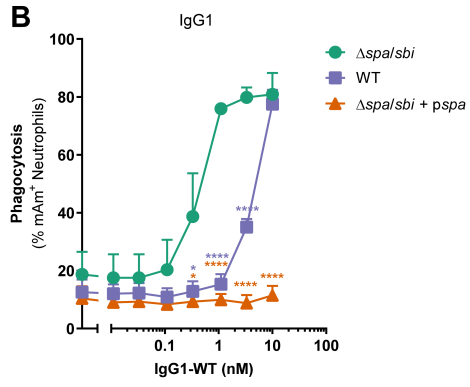**C**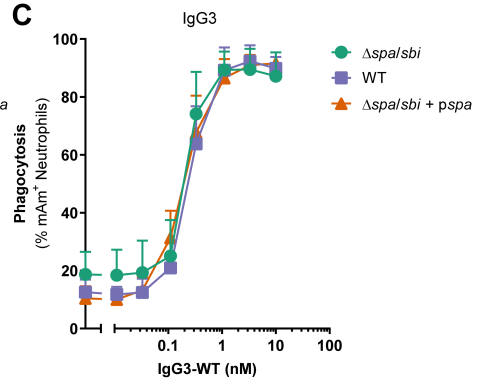

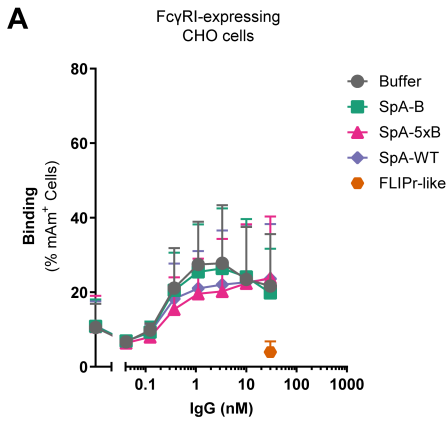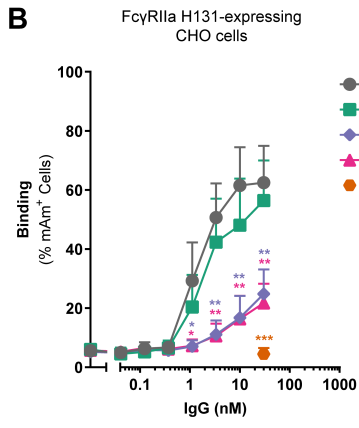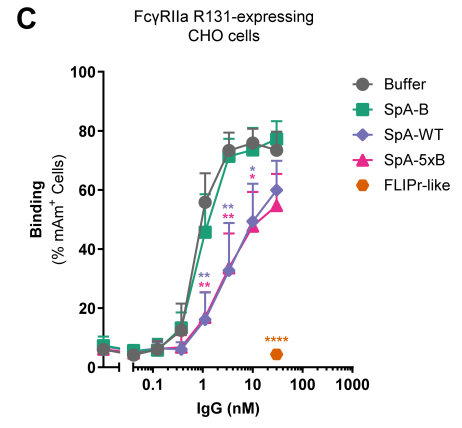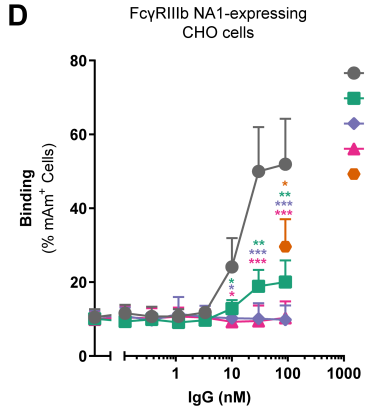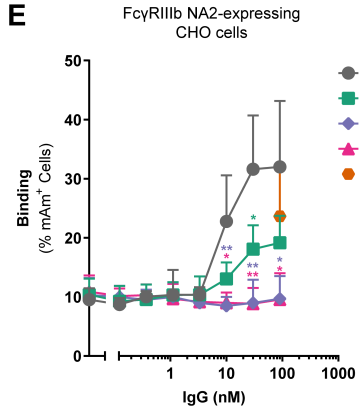

**A**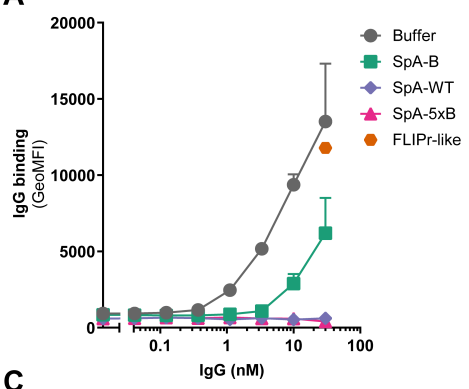**B**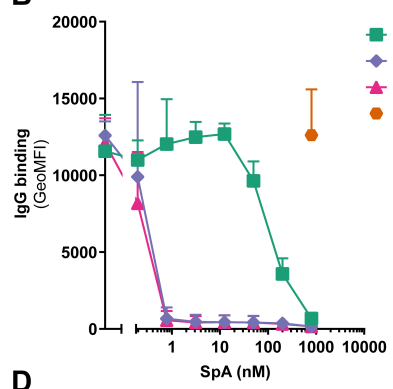**C**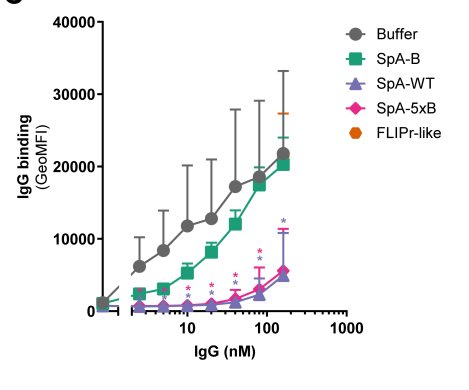**D**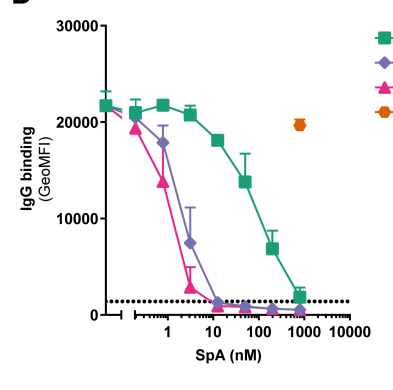**E**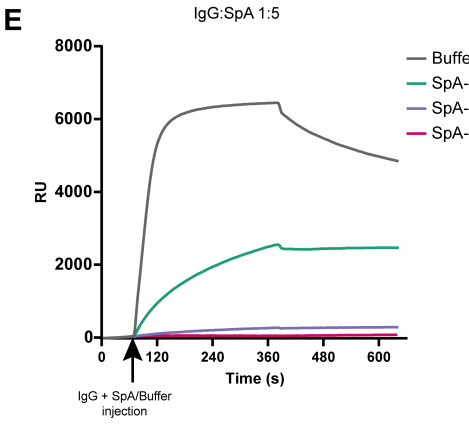**F**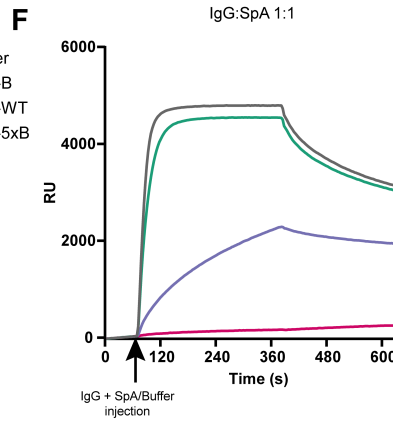



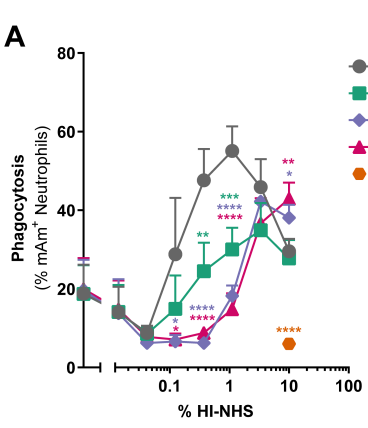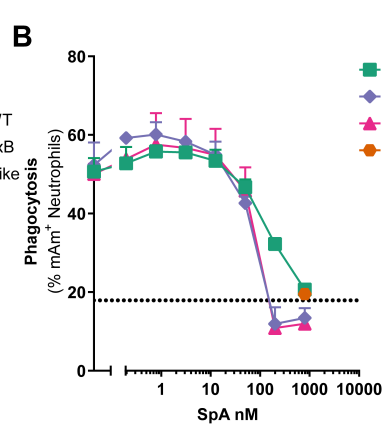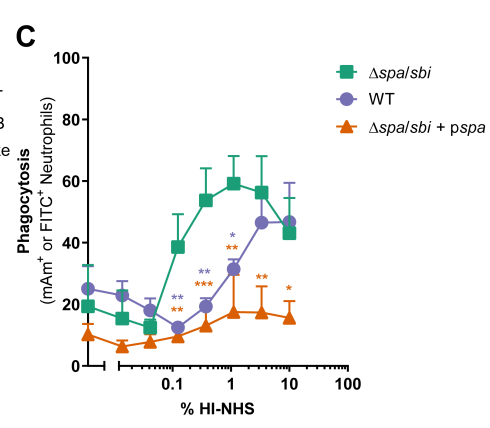

Source: https://www.biorxiv.org/content/10.1101/2022.01.21.477287v1.full.pdf
